# Supplementary material for: Pattern of Breast Cancer Distribution in Ghana: A Survey to Enhance Early Detection, Diagnosis, and Treatment
Source: Hindawi journal article supplement (doi:10.1155/2016/3645308), 2016-01-01

Supplementary Figure 1

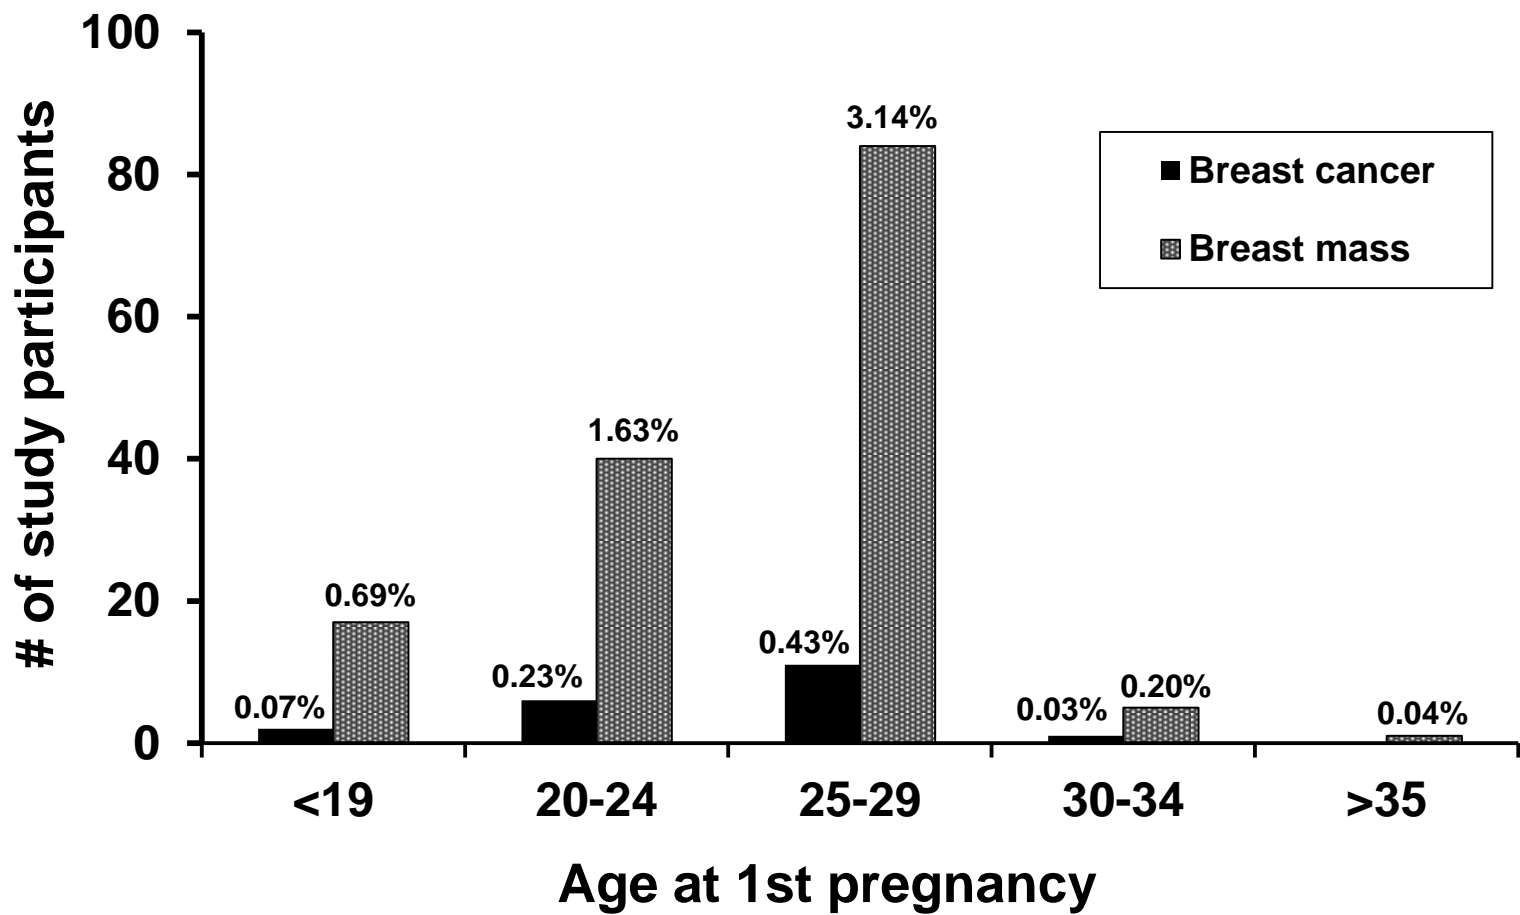

Supplement: f1 [file 3645308.f1.pdf]
